# Supplementary material for: A sandwich-type bacteriophage-based amperometric biosensor for the detection of Shiga toxin-producing Escherichia coli serogroups in complex matrices
Source: Royal Society of Chemistry journal article supplement (doi:10.1039/d0ra06223e), 2020-01-01
Supplement: d0ra06223e1.pdf [file d0ra06223e1.pdf]

## Supplementary Information

### **A Sandwich-type Bacteriophage-Based Amperometric Biosensor for the Detection of Shiga Toxin-Producing *Escherichia coli* Serogroups in Complex Matrices**

Irwin A. Quintela<sup>a</sup> and Vivian C.H. Wu<sup>a,\*</sup>

<sup>a</sup> Produce Safety and Microbiology Research Unit, U.S. Department of Agriculture, Agricultural Research Services, Western Regional Research Center, Albany, California, USA

**\*Corresponding Author:**

Vivian C.H. Wu, Produce Safety and Microbiology Research Unit, U.S. Department of Agriculture, Agricultural Research Services, Western Regional Research Center, Albany, California, USA; [vivian.wu@usda.gov](mailto:vivian.wu@usda.gov)

Supplementary figures and tables.

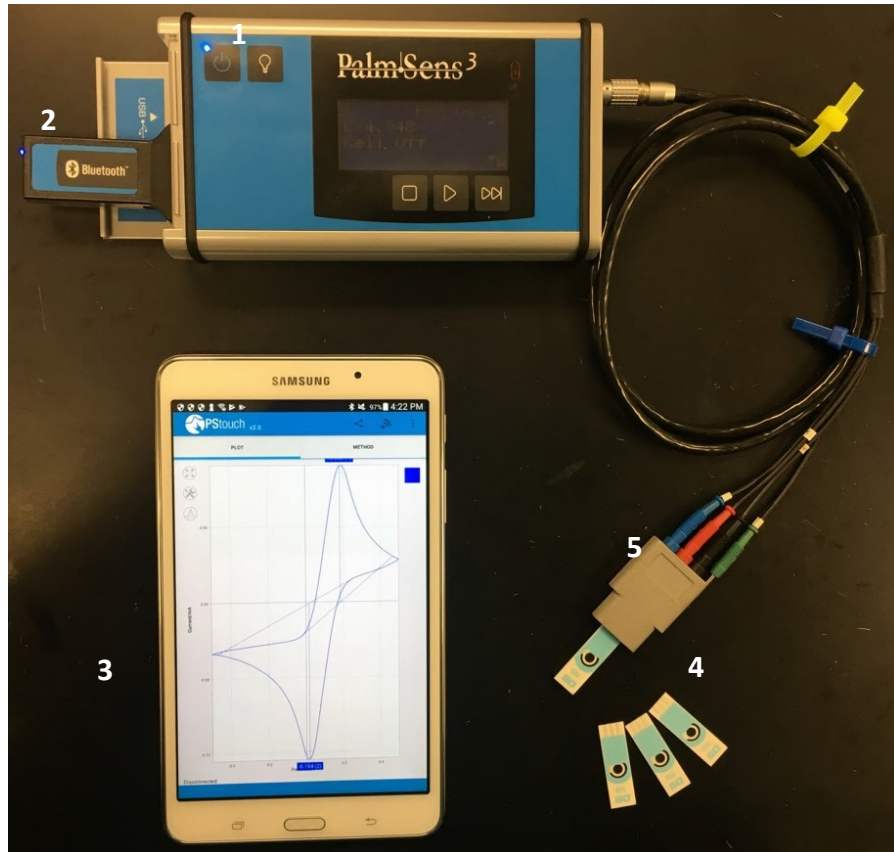

**Fig. S1.** The complete configuration of the biosensor architecture. 1-PalmSens3, 2-Bluetooth dongle, 3-Android device, 4-SPCEs, 5-SPCE holder, and connector.

**Table S1. List of natural environmental water samples from Pescadero, CA.** All samples were provided by USDA-WRRC-ARS (PSM Unit).

| Sample/Site | Sample ID | Description              | Sampling Sites |
|-------------|-----------|--------------------------|----------------|
| 1           | P1-D      | Sediment water samples   | Pescadero, CA  |
| 2           | P8-W      | Irrigation water samples | Pescadero, CA  |
| 3           | P1-W      | Irrigation water samples | Pescadero, CA  |
| 4           | P7-W      | Irrigation water samples | Pescadero, CA  |

**Table S2. Primers for *stx* genes.** <sup>1</sup>

| Name                               | Sequence                        |
|------------------------------------|---------------------------------|
| <i>stx1</i> For( <i>stx1</i> -1-F) | 5' - CATCGCGAGTTGCCAGAATG - 3'  |
| <i>stx1</i> Rev( <i>stx1</i> -1-R) | 5' - AATTGCCCCCAGAGTGGATG - 3'  |
| <i>stx2</i> For( <i>stx2</i> -5-F) | 5' - GTATAC GATGACGCCGGGAG - 3' |
| <i>stx2</i> For( <i>stx2</i> -5-R) | 5' - TTCTCCCCACTCTGACACCA - 3'  |

The conventional PCR conditions were as follows, denaturation at 95 °C for 2 min; 35 cycles of 30 sec denaturation at 95 °C, annealing at 56 °C for 30 sec, elongation at 72 °C for 30 sec and a final extension at 72 °C for 5 min. The initial standard plate count method using MacConkey Sorbitol agar was conducted for STEC isolation and quantification. All plates were incubated overnight at 37 °C.

**Table S3. Standard curve of the high-titer representative bacteriophage stocks (PFU mL<sup>-1</sup>) and its concentration in µg mL<sup>-1</sup>.**

| Titer Level (PFU mL <sup>-1</sup> ) | Concentration (µg mL <sup>-1</sup> ) |
|-------------------------------------|--------------------------------------|
| 10 <sup>9</sup>                     | 550                                  |
| 10 <sup>10</sup>                    | 720                                  |
| 2.5 × 10 <sup>10</sup>              | 900                                  |
| 7 × 10 <sup>10</sup>                | 950                                  |

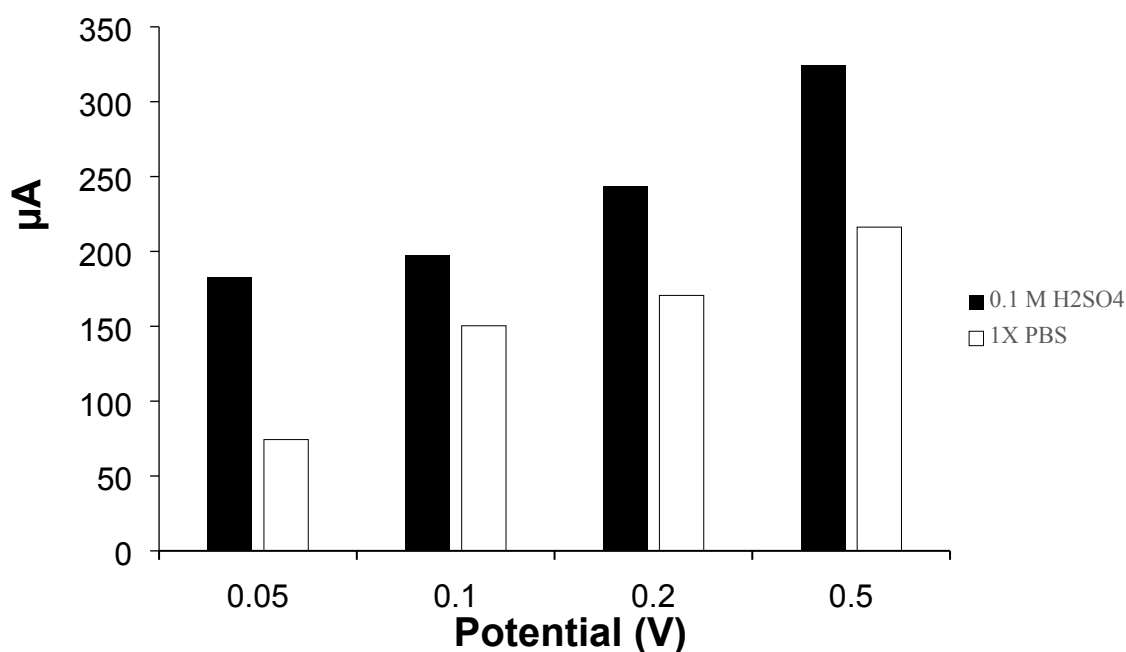

**Figure S2. Bar graph representation of the electrochemical characterization of unmodified SPCEs.** Voltammograms were recorded at increasing scan rates of 0.5 mM  $K_3[Fe(CN)_6]$  in two different supporting electrolytes. The peak separation ( $\Delta E_p$ , mV) between the oxidation and reduction potentials were recorded as a function of the surface of SPCEs.

**Table S4. Modification of SPCE.** Characterization of SPCE by measuring  $\Delta E_p$  (mV) after modifying it with various reagents.

| Modified SPCE          | $\Delta E_p$ (mV) |
|------------------------|-------------------|
| CMD-dextran modified   | 160.481           |
| EDC-NHS modified       | 201.023           |
| Streptavidin modified  | 216.228           |
| Bacteriophage modified | 236.499           |
| FeDC modified          | 216.227           |
| AuNP modified          | 207.781           |
| BSA modified           | 216.227           |
| Casein modified        | 206.091           |
| Protein free modified  | 206.091           |
| PEG                    | 195.956           |

(A)

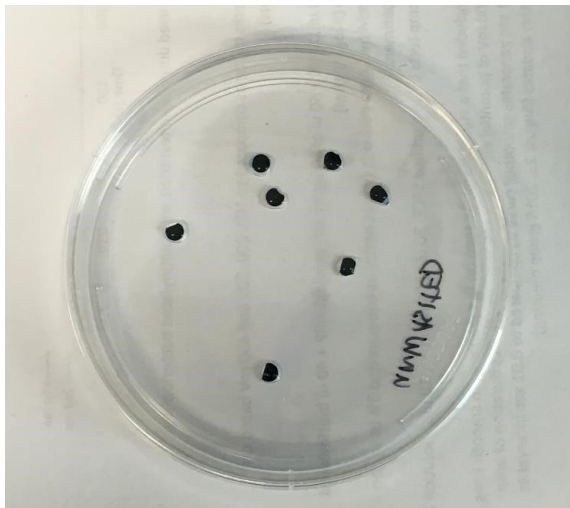

(B)

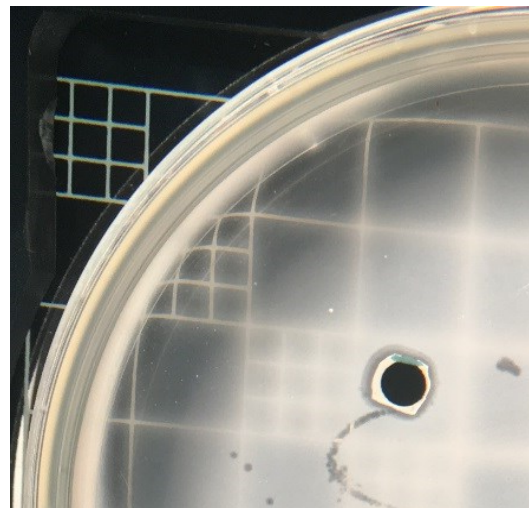

**Figure S3. Agar diffusion test of bacteriophage-modified SPCE.** (A) Biotinylated O179 bacteriophages were immobilized onto the surface of the trimmed activated working electrode (WE) (B) After several washing and incubation steps prior to agar diffusion assay, WE showed zone of the clearing.

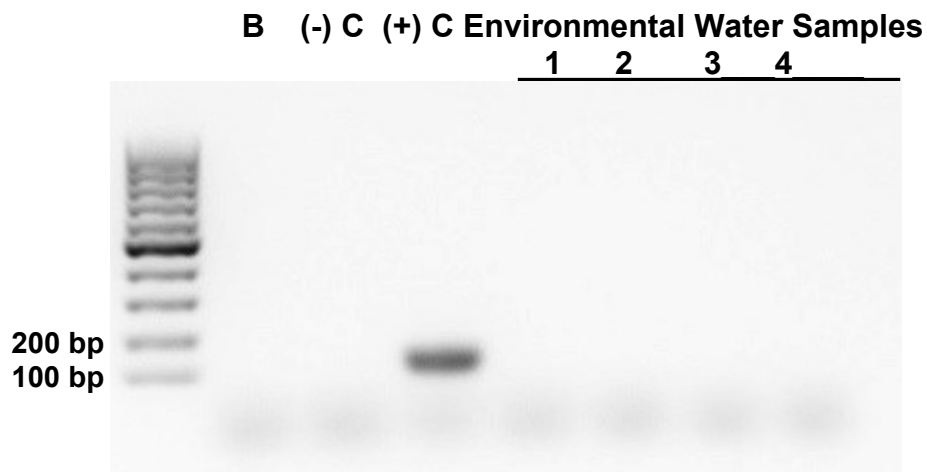

**Figure S4. Gel image showing four environmental samples after conventional PCR targeting *stxI* gene.** None of the samples showed bands for *stxI*(119-bp) gene. B-Blank, (-) C-Negative Control (*S. Typhimurium*), (+)C-Positive Control (O157:H7), 1-Site 1(P1-D), 2-Site 2(P8-W), 3-Site 3(P1-W) and 4-Site 4(P7-W)

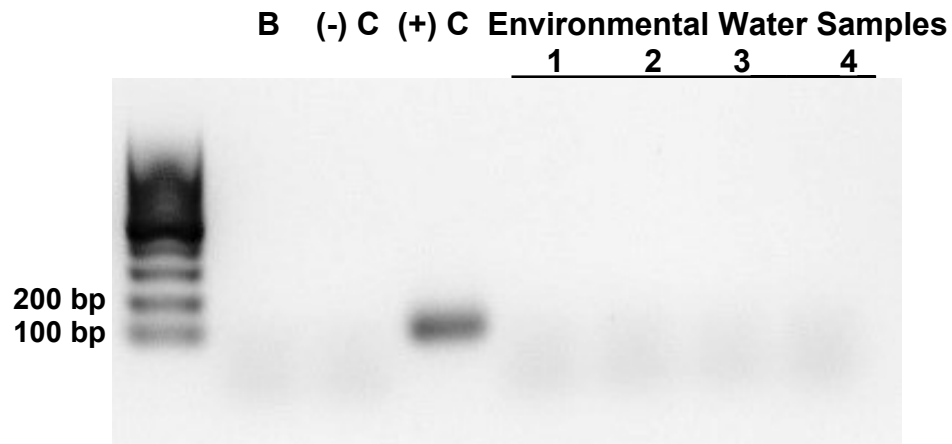

**Figure S5. Gel image showing four environmental samples after conventional PCR targeting *stx2* gene.** None of the samples showed bands for *stx2* (104-bp) gene. B-Blank, (-) C-Negative Control (*S. Typhimurium*), (+) C-Positive Control (O157:H7), 1-Site 1(P1-D), 2-Site 2(P8-W), 3-Site 3(P1-W) and 4-Site 4(P7-W)

### References

1. I. A. Quintela, B. G. de los Reyes, C.-S. Lin and V. C. Wu, *Nanoscale*, 2015, 7, 2417-2426.
